# Supplementary material
Source: publisher site journal article supplement (https://www.dovepress.com/article/430513)
Supplement: Supplementary file 1 [file get_supplementary_file.php]

**Supplementary information for**

**Therapeutic advantage of targeting PRMT5 in  
combination with chemotherapies or EGFR/HER2  
inhibitors in triple-negative breast cancers**

Rayan Dakroub <sup>1,2</sup>, Solène Huard <sup>1</sup>, Yara Hajj-Younes <sup>1</sup>, Samyuktha Suresh<sup>1</sup>, Bassam Badran <sup>2</sup>, Hussein Fayyad-Kazan <sup>2</sup>, and Thierry Dubois <sup>1</sup>

<sup>1</sup> Breast Cancer Biology Group, Translational Research Department, Institute Curie-PSL Research University, 75005 Paris, France

<sup>2</sup> Laboratory of Cancer Biology and Molecular Immunology, Faculty of Sciences-I, Lebanese University, Hadath 1003, Lebanon

Correspondence: Thierry Dubois

Breast Cancer Biology Group, Translational Research Department, Institute Curie-PSL Research University, 75005 Paris, France

Te+33 156246250

Email: [thierry.dubois@curie.fr](mailto:thierry.dubois@curie.fr)

**This PDF file includes:**

Supplementary Tables S1 to S3

Supplementary Figures S1 to S5

**Table S1: Doubling time of the breast cell lines, and the assays used to measure proliferation**

| Cell line  | Doubling Time (hours) | Treatment duration (days) | Proliferation assay |
|------------|-----------------------|---------------------------|---------------------|
| MCF10A     | 16                    | 3                         | MTT                 |
| T47D       | 43                    | 7                         | MTT                 |
| MCF7       | 45                    | 7                         | MTT                 |
| HCC1954    | 40                    | 7                         | MTT                 |
| BT474      | 40                    | 7                         | MTT                 |
| HCC38      | 60                    | 7                         | WST-1               |
| MDA-MB-453 | 55                    | 7                         | MTT                 |
| MDA-MB-468 | 45                    | 7                         | MTT                 |
| BT20       | 50                    | 7                         | MTT                 |
| HCC70      | 50                    | 7                         | MTT                 |
| MDA-MB-231 | 25                    | 4                         | CTG                 |

Abbreviations: CTG, CellTiter-Glo luminescent cell viability assay; MTT, 3-(4,5-dimethylthiazol-2-yl)-2,5-diphenyltetrazolium bromide-based assay; WST-1, water-soluble tetrazolium salt based assay.

**Table S2: Sensitivity of breast cell lines to EPZ015938 and EPZ015666**

| Cell line  | Classification         | EPZ015938                                | EPZ015666                                  |
|------------|------------------------|------------------------------------------|--------------------------------------------|
|            |                        | IC <sub>50</sub> (nM ± SD)<br>This study | IC <sub>50</sub> (nM ± SD)<br>From Ref. 23 |
| MCF10A     | Normal epithelial      | 722.8 ± 122                              | 42684 ± 14200                              |
| MCF12A     | Normal epithelial      | ND                                       | 47078 ± 11200                              |
| T47D       | Luminal                | 304 ± 244.8                              | ND                                         |
| MCF7       | Luminal                | 191.5 ± 47                               | 2642 ± 1010                                |
| HCC1954    | HER2-positive          | 54.2 ± 19.4                              | 812 ± 140                                  |
| SKBr3      | HER2-positive          | ND                                       | 3939 ± 1930                                |
| BT474      | HER2-positive          | 625.5 ± 217.6                            | ND                                         |
| HCC38      | TNBC (BL1)             | 21.9 ± 8.7                               | 2770 ± 1430                                |
| MDA-MB-453 | TNBC (LAR)             | 109.4 ± 13.4                             | 985 ± 256                                  |
| MDA-MB-468 | TNBC (BL1)             | 319.3 ± 226.2                            | 2224 ± 909                                 |
| BT20       | TNBC<br>(unclassified) | >1000                                    | 12316 ± 7800                               |
| HCC70      | TNBC (BL2)             | >1000                                    | 29852 ± 5650                               |
| MDA-MB-231 | TNBC (M)               | >1000                                    | ND                                         |
| MDA-MB-157 | TNBC (M)               | ND                                       | 33365 ± 1729                               |
| Hs578T     | TNBC (M)               | ND                                       | 67847 ± 17600                              |

Abbreviations: BL1, basal-like 1; BL2, basal-like 2; IC<sub>50</sub>, half-maximal inhibitory concentration; LAR, luminal androgen receptor; M, mesenchymal; ND, not determined; SD, Standard deviation; TNBC, Triple-negative breast cancer.

**Table S3: IC<sub>50</sub> of the inhibitors used in the study**

|              | IC <sub>50</sub> (nM ± SD) |             |              |             |            |
|--------------|----------------------------|-------------|--------------|-------------|------------|
|              | BT20                       | MDA-MB-231  | MDA-MB-468   | MDA-MB-453  | HCC1954    |
| Neratinib    | 1502 ± 519                 | 918.3 ± 478 | 30.9 ± 14    | 22.6 ± 10   | 14.2 ± 1.8 |
| Tucatinib    | >5000                      | ND          | >5000        | 431.2 ± 162 | 508.6 ± 61 |
| Erlotinib    | 2379 ± 911                 | >5000       | 1950 ± 490   | >5000       | ND         |
| Cisplatin    | 155.7 ± 56.5               | >5000       | 133.8 ± 49.5 | 949.1 ± 340 | ND         |
| Camptothecin | 6.2 ± 2.1                  | 53.8 ± 15   | 7.7 ± 2.9    | 6.9 ± 0.4   | ND         |
| Paclitaxel   | 1.39 ± 0.5                 | 5.8 ± 3     | 5.4 ± 0.4    | 1.05 ± 0.2  | ND         |
| Doxorubicin  | 7.08 ± 1.2                 | 0.07 ± 0.03 | 19.9 ± 6.7   | 0.04 ± 0.01 | ND         |

Abbreviations: IC<sub>50</sub>, half-maximal inhibitory concentration; ND, not determined; SD, Standard deviation.

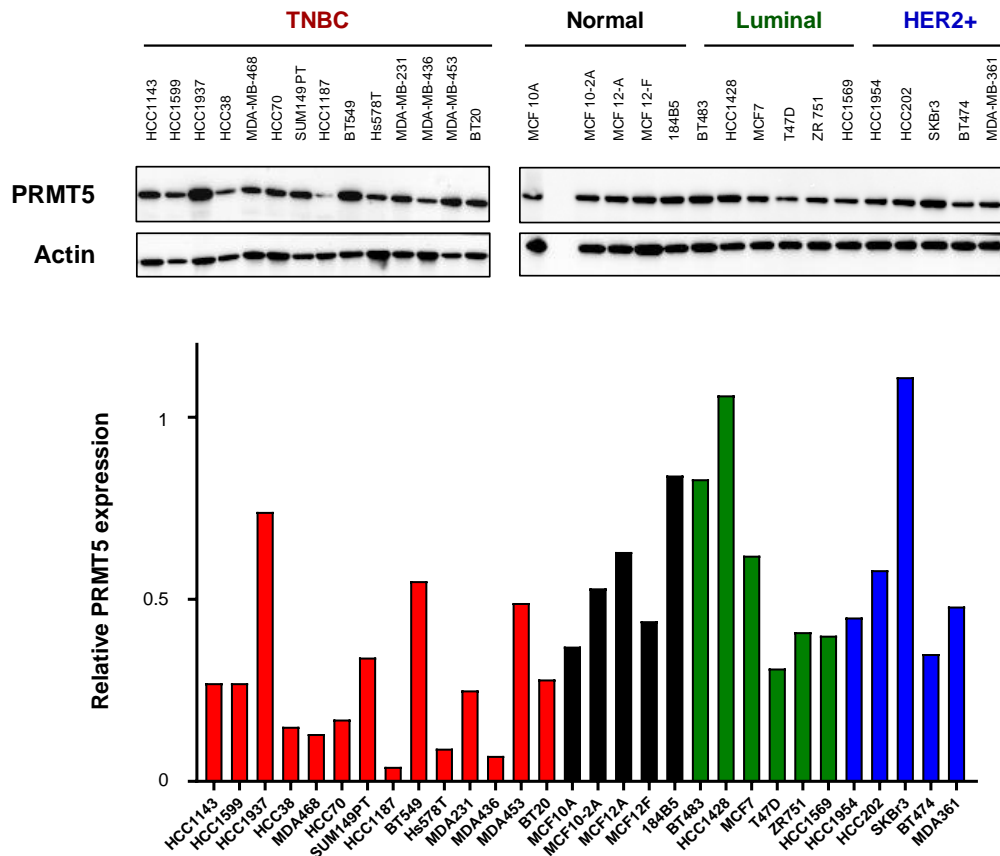

**Supplementary figure 1. PRMT5 expression in breast cell lines.** PRMT5 expression was assessed in breast cancer cells of the different subtypes (TNBC, luminal, HER2-positive) and normal breast cell lines by western blotting. Actin was used as a loading control. The graphs represent the relative amount of PRMT5 normalized to actin. Noteworthy, the levels of actin may vary across the different cell lines.

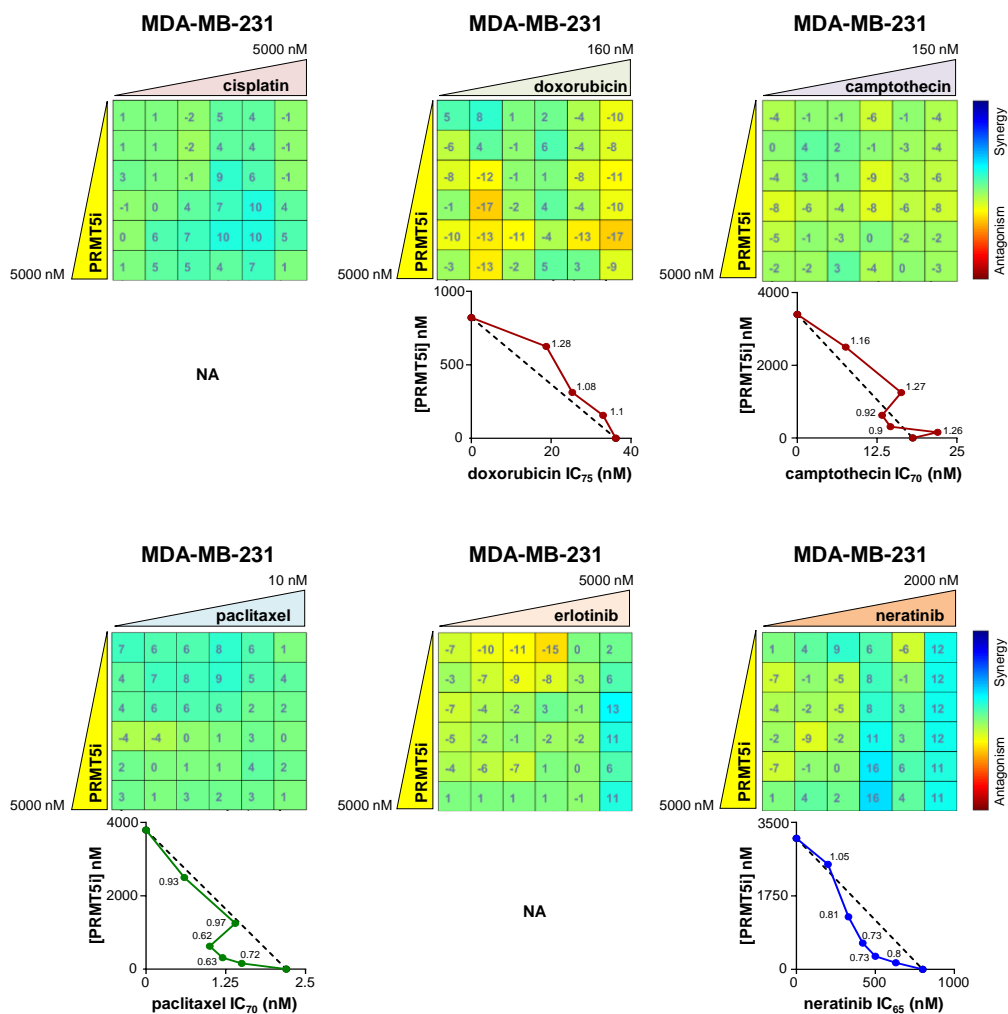

**Supplementary figure 2. Effect of the inhibition of PRMT5 in combination with chemotherapies, erlotinib and neratinib on MDA-MB-231 cell proliferation.** MDA-MB-231 TNBC cells were seeded in 96-well plates and treated with varying concentrations of EPZ015938 (PRMT5i) and/or cisplatin, doxorubicin, camptothecin, paclitaxel, erlotinib, or neratinib, then cell proliferation was measured after four mitotic cycles (4 days). Percentage of viable cells was normalized to DMSO or DMSO + H<sub>2</sub>O (when cisplatin was used)-treated cells. Each drug was used at a maximal concentration of 2xIC<sub>50</sub> or 5  $\mu$ M maximum when MDA-MB-231 are resistant to the inhibitor, followed by two-fold serial dilutions. The nature of drug interaction between EPZ015938 and the different inhibitors was assessed using the Loewe model on the Combenefit software. The synergy matrix (upper panel) and isobologram (bottom panel) for each combination are shown. The isobolograms represent the IC<sub>60</sub> of neratinib, IC<sub>70</sub> of paclitaxel and camptothecin or IC<sub>75</sub> of doxorubicin (X-axis) obtained at various EPZ015938 concentrations (Y-axis). CI were calculated at the different EPZ015938 concentrations used and are shown on the isobolograms. Isobolograms of the combination between EPZ015938 and cisplatin or erlotinib could not be plotted as the treatment with cisplatin or erlotinib alone did not impair cell viability more than 20% and are indicated as NA (not applicable). Data are representative of at least three independent experiments.

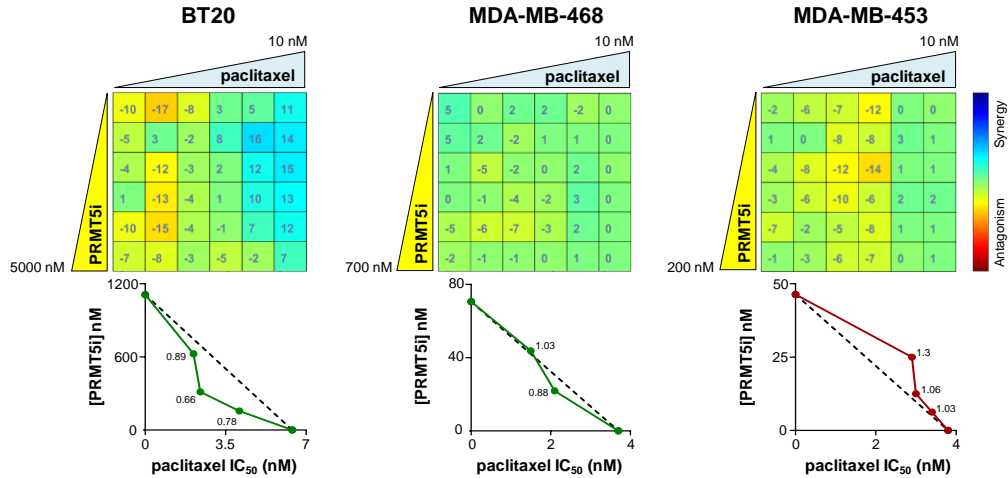

**Supplementary figure 3. Effect of the inhibition of PRMT5 in combination with paclitaxel on TNBC cell proliferation.** BT20, MDA-MB-468, and MDA-MB-453 TNBC cells were seeded in 96-well plates and treated with varying concentrations of EPZ015938 (PRMT5i) and/or paclitaxel, then cell proliferation was measured after four mitotic cycles (7 days). Percentage of viable cells was normalized to DMSO-treated cells. Each drug was used at a maximal concentration of  $2 \times IC_{50}$  for sensitive cell lines (5  $\mu M$  maximum for resistant cells), followed by two-fold serial dilutions. The nature of drug interaction between EPZ015938 and paclitaxel was assessed using the Loewe model on the Combenefit software. The synergy matrix (upper panel) and isobologram (bottom panel) for each cell line are shown. The isobolograms represent the  $IC_{50}$  of paclitaxel (X-axis) obtained at various EPZ015938 concentrations (Y-axis). CI calculated at the different EPZ015938 concentrations used are shown on the isobolograms. CI were calculated at the different EPZ015938 concentrations used and are shown on the isobolograms. Data are representative of at least three independent experiments.

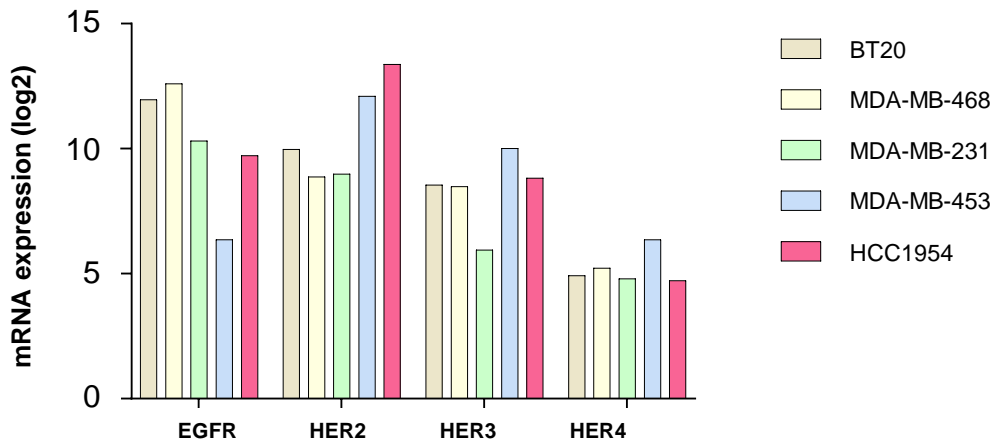

**Supplementary figure 4. mRNA expression of the four HER family members in breast cancer cell lines.** mRNA expression (log2 transformed) of EGFR, HER2, HER3 and HER4 in BT20, MDA-MB-468, MDA-MB-231, MDA-MB-453, and HCC1954 cells.

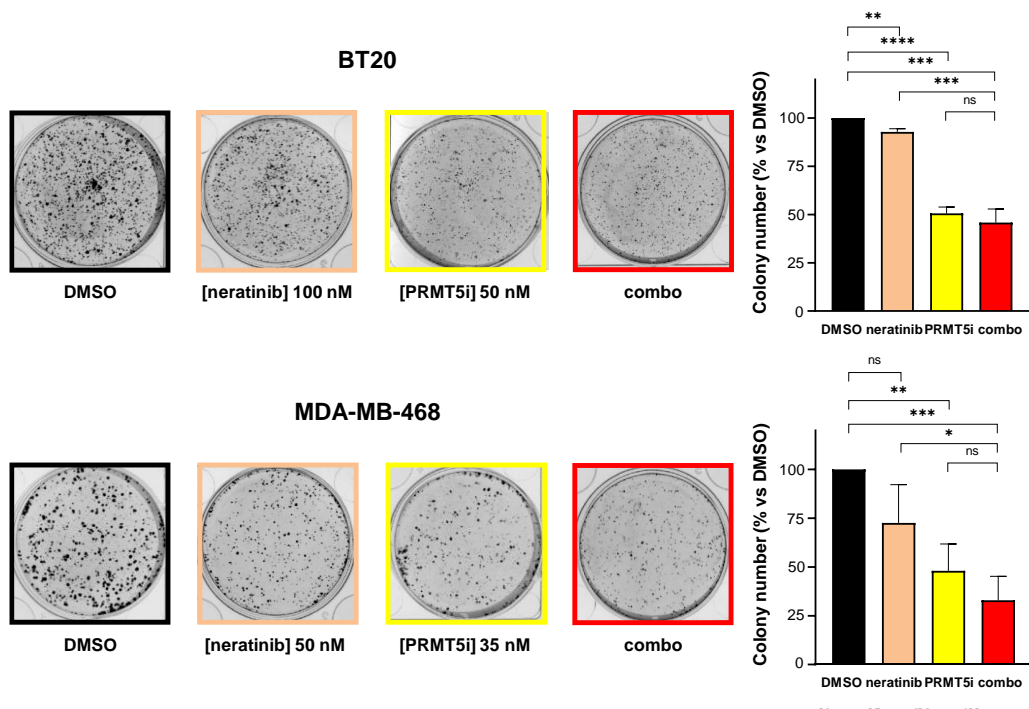

**Supplementary figure 5. Effect of the inhibition of PRMT5 in combination with neratinib on TNBC cell colony formation.** BT20 and MDA-MB-468 cells were seeded at low densities then treated with DMSO, EPZ015938 (PRMT5i), neratinib, or a combination (combo) of the two inhibitors. Colonies were quantified using ImageJ software. An image for each condition is shown and is representative of three independent experiments (left panel). Quantification of colony number is expressed as a percentage relative to DMSO-treated cells and represented as a mean  $\pm$  SD of three independent experiments (right panel). P values were calculated using student t-test and presented as: \* $p < 0.05$ , \*\* $p < 0.01$ , \*\*\* $p < 0.001$ , \*\*\*\* $p < 0.0001$ , ns = non-significant.
